# Supplementary material for: Group III phospholipase A2 promotes colitis and colorectal cancer
Source: PubMed Central journal article supplement (PMC5612992; doi:10.1038/s41598-017-12434-z), 2017-09-25
Supplement: 41598_2017_12434_MOESM1_ESM.pdf [file 41598_2017_12434_MOESM1_ESM.pdf]

## Supplementary information

### Group III phospholipase A<sub>2</sub> promotes colitis and colorectal cancer

Remi Murase<sup>1,2</sup>, Yoshitaka Taketomi<sup>1,2</sup>, Yoshimi Miki<sup>1,2</sup>, Yasumasa Nishito<sup>3</sup>, Moe Saito<sup>2,4</sup>, Kiyoko Fukami<sup>4</sup>, Kei Yamamoto<sup>2,5,6</sup>, and Makoto Murakami<sup>1,2,7</sup>

<sup>1</sup>Laboratory of Microenvironmental and Metabolic Health Science, Center for Disease Biology and Integrative Medicine, Graduate School of Medicine, the University of Tokyo, 7-3-1 Hongo, Bunkyo-ku, Tokyo 113-8655, Japan.

<sup>2</sup>Lipid Metabolism Project, Tokyo Metropolitan Institute of Medical Science, 2-1-6 Kamikitazawa, Setagaya-ku, Tokyo 156-8506, Japan.

<sup>3</sup>Core Technology and Research Center, Tokyo Metropolitan Institute of Medical Science, 2-1-6 Kamikitazawa, Setagaya-ku, Tokyo 156-8506, Japan.

<sup>4</sup>Laboratory of Genome and Biosignal, Tokyo University of Pharmacy and Life Science, 1432-1 Horinouchi, Hachioji, 192-0392 Tokyo, Japan.

<sup>5</sup>Faculty of Bioscience and Bioindustry, Tokushima University, Tokushima 770-8513, Japan.

<sup>6</sup>PRIME, Japan Agency for Medical Research and Development, Tokyo 100-0004, Japan.

<sup>7</sup>AMED-CREST, Japan Agency for Medical Research and Development, Tokyo 100-0004, Japan.

**Running title:** Group III sPLA<sub>2</sub> and colorectal diseases

Address correspondence to: Makoto Murakami, Ph.D. at the Laboratory of Microenvironmental and Metabolic Health Sciences, Center for Disease Biology and Integrative Medicine, Graduate School of Medicine, the University of Tokyo, 7-3-1 Hongo, Bunkyo-ku, Tokyo 113-0033, Japan.

Tel: 81-3-5841-1431; Fax: 81-3-5841-1434; Email: makmurak@m.u-tokyo.ac.jp

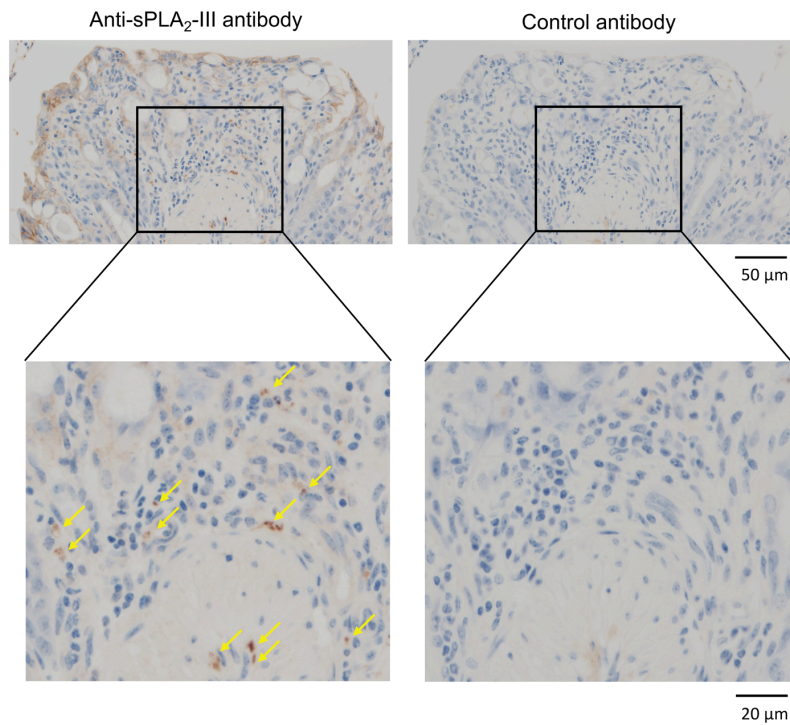

**Supplementary Figure 1.**

**Immunohistochemistry of sPLA<sub>2</sub>-III in the colon of DSS-treated mice, related to Fig. 3.**

The colon of WT mice treated for 6 days with DSS was subjected to immunohistochemistry using anti-sPLA<sub>2</sub>-III or control antibody. The anti-sPLA<sub>2</sub>-III antibody mainly stained collapsing epithelial cells. Although most inflammatory cells infiltrating beneath the damaged epithelium were sPLA<sub>2</sub>-III-negative, a minor population of immune cells was sporadically stained for sPLA<sub>2</sub>-III (*arrows*). Control antibody gave no staining.

### Supplementary Table 1.

#### Microarray gene profiling of lipid-metabolic genes in the colons of *Pla2g3*<sup>+/+</sup> and *Pla2g3*<sup>-/-</sup> mice, related to Fig. 2e.

Expression profiles of genes associated with lipid biosynthesis, degradation, and consumption in *Pla2g3*<sup>-/-</sup> (KO) colon relative to littermate *Pla2g3*<sup>+/+</sup> (WT) colon with or without AOM treatment, as assessed by DNA microarray analysis. Fold changes (KO/WT) are indicated. Equal amounts of total RNA pooled from four mice for each genotype were used. Genes showing a >2-fold increase (red) or >50% reduction (blue) in expression are highlighted.

#### Lipogenesis and lipid mediator synthesis

| Gene Name      | Description                                               | Accession No. | Normal | AOM   |
|----------------|-----------------------------------------------------------|---------------|--------|-------|
|                |                                                           |               | KO/WT  | KO/WT |
| <i>Acsc1</i>   | Acyl-CoA synthetase short-chain family member 1           | NM_080575     | 0.88   | 2.16  |
| <i>Acsc2</i>   | Acyl-CoA synthetase short-chain family member 2           | NM_019811     | 0.87   | 5.61  |
| <i>Acsm3</i>   | Acyl-CoA synthetase medium-chain family member 3          | NM_212441     | 0.98   | 6.84  |
| <i>Acsl1</i>   | Acyl-CoA synthetase long-chain family member 1            | NM_007981     | 0.92   | 1.48  |
| <i>Acsl3</i>   | Acyl-CoA synthetase long-chain family member 3            | NM_028817     | 0.98   | 2.85  |
| <i>Acsl4</i>   | Acyl-CoA synthetase long-chain family member 4            | NM_207625     | 0.78   | 0.38  |
| <i>Acsl5</i>   | Acyl-CoA synthetase long-chain family member 5            | NM_027976     | 1.13   | 1.01  |
| <i>Acsl2</i>   | Acyl-CoA synthetase family member 2                       | NM_153807     | 0.99   | 1.22  |
| <i>Acsl3</i>   | Acyl-CoA synthetase family member 3                       | NM_144932     | 1.06   | 1.45  |
| <i>Elovl1</i>  | Elongation of very long chain fatty acids family member 1 | NM_001039176  | 1.04   | 1.03  |
| <i>Elovl5</i>  | Elongation of very long chain fatty acids family member 5 | NM_134255     | 0.82   | 0.75  |
| <i>Elovl6</i>  | Elongation of very long chain fatty acids family member 6 | NM_130450     | 1.15   | 0.54  |
| <i>Elovl7</i>  | Elongation of very long chain fatty acids family member 7 | NM_029001     | 1.00   | 1.65  |
| <i>Fads1</i>   | Fatty acid desaturase 1                                   | NM_146094     | 0.94   | 0.29  |
| <i>Fads2</i>   | Fatty acid desaturase 2                                   | NM_019699     | 0.86   | 1.03  |
| <i>Fads3</i>   | Fatty acid desaturase 3                                   | NM_021890     | 1.01   | 1.09  |
| <i>Fasn</i>    | Fatty acid synthase                                       | NM_007988     | 0.64   | 0.68  |
| <i>Ptgs1</i>   | Prostaglandin-endoperoxide synthase 1 (COX-1)             | NM_008969     | 0.89   | 0.95  |
| <i>Ptgs2</i>   | Prostaglandin-endoperoxide synthase 2 (COX-2)             | NM_011198     | 0.73   | 0.08  |
| <i>Ptges</i>   | Prostaglandin E synthase                                  | NM_022415     | 0.98   | 0.24  |
| <i>Ptges2</i>  | Prostaglandin E synthase 2                                | NM_133783     | 1.10   | 1.11  |
| <i>Ptges3</i>  | Prostaglandin E synthase 3 (cytosolic)                    | NM_019766     | 1.15   | 0.66  |
| <i>Ptgis</i>   | Prostaglandin I <sub>2</sub> (prostacyclin) synthase      | NM_008968     | 0.95   | 1.15  |
| <i>Tbxas1</i>  | Thromboxane A synthase 1, platelet                        | NM_011539     | 0.84   | 0.26  |
| <i>Aloxe3</i>  | Arachidonate lipoxygenase 3                               | NM_011786     | 0.23   | 1.00  |
| <i>Alox5</i>   | Arachidonate 5-lipoxygenase                               | NM_009662     | 1.03   | 0.76  |
| <i>Alox12</i>  | Arachidonate 12-lipoxygenase                              | NM_007440     | 1.08   | 0.02  |
| <i>Alox12b</i> | Arachidonate 12-lipoxygenase, 12R type                    | NM_009659     | 0.84   | 1.32  |
| <i>Alox12e</i> | Arachidonate lipoxygenase, epidermal                      | NM_145684     | 0.85   | 0.29  |

|               |                                                |              |      |      |
|---------------|------------------------------------------------|--------------|------|------|
| <i>Agpat1</i> | 1-acylglycerol-3-phosphate O-acyltransferase 1 | NM_001163379 | 1.00 | 2.28 |
| <i>Agpat2</i> | 1-acylglycerol-3-phosphate O-acyltransferase 2 | NM_026212    | 1.16 | 0.78 |
| <i>Agpat3</i> | 1-acylglycerol-3-phosphate O-acyltransferase 3 | NM_053014    | 0.94 | 0.67 |
| <i>Agpat4</i> | 1-acylglycerol-3-phosphate O-acyltransferase 4 | NM_026644    | 1.01 | 6.17 |
| <i>Agpat5</i> | 1-acylglycerol-3-phosphate O-acyltransferase 5 | NM_026792    | 0.95 | 1.01 |
| <i>Agpat6</i> | 1-acylglycerol-3-phosphate O-acyltransferase 6 | NM_018743    | 1.03 | 0.86 |
| <i>Agpat9</i> | 1-acylglycerol-3-phosphate O-acyltransferase 9 | NM_172715    | 1.11 | 1.06 |
| <i>Lpcat1</i> | Lysophosphatidylcholine acyltransferase 1      | NM_145376    | 0.93 | 1.65 |
| <i>Lpcat2</i> | Lysophosphatidylcholine acyltransferase 2      | NM_173014    | 5.19 | 2.74 |
| <i>Lpcat3</i> | Lysophosphatidylcholine acyltransferase 3      | NM_145130    | 1.05 | 0.76 |

### Phospholipase A<sub>2</sub>s and related enzymes

| Gene Name       | Description                                                                                   | Accession No. | Normal<br>KO/WT | AOM<br>KO/WT |
|-----------------|-----------------------------------------------------------------------------------------------|---------------|-----------------|--------------|
| <i>Pla1a</i>    | Phospholipase A <sub>1</sub> member A                                                         | NM_134102     | 0.80            | 0.28         |
| <i>Pla2g2c</i>  | Phospholipase A <sub>2</sub> , group IIC (sPLA <sub>2</sub> -IIC)                             | NM_008868     | 1.23            | 3.49         |
| <i>Pla2g2d</i>  | Phospholipase A <sub>2</sub> , group IID (sPLA <sub>2</sub> -IID)                             | NM_011109     | 0.61            | 0.04         |
| <i>Pla2g2e</i>  | Phospholipase A <sub>2</sub> , group IIE (sPLA <sub>2</sub> -IIE)                             | NM_012044     | 0.77            | 0.21         |
| <i>Pla2g2f</i>  | Phospholipase A <sub>2</sub> , group IIF (sPLA <sub>2</sub> -IIF)                             | NM_012045     | 0.88            | 1.11         |
| <i>Pla2g5</i>   | Phospholipase A <sub>2</sub> , group V (sPLA <sub>2</sub> -V)                                 | NM_011110     | 0.85            | 2.92         |
| <i>Pla2g10</i>  | Phospholipase A <sub>2</sub> , group X (sPLA <sub>2</sub> -X)                                 | NM_001291009  | 0.90            | 3.09         |
| <i>Pla2g12a</i> | Phospholipase A <sub>2</sub> , group XIII (sPLA <sub>2</sub> -XIII)                           | NM_183423     | 0.97            | 0.19         |
| <i>Pla2g12b</i> | Phospholipase A <sub>2</sub> , group XIIB (sPLA <sub>2</sub> -XIIB)                           | NM_023530     | 1.04            | 3.80         |
| <i>Pla2g4a</i>  | Phospholipase A <sub>2</sub> , group IVA (cPLA <sub>2</sub> α)                                | NM_008869     | 0.99            | 1.53         |
| <i>Pla2g4b</i>  | Phospholipase A <sub>2</sub> , group IVB (cPLA <sub>2</sub> β)                                | NM_145378     | 1.01            | 1.18         |
| <i>Pla2g4f</i>  | Phospholipase A <sub>2</sub> , group IVF (cPLA <sub>2</sub> ζ)                                | NM_001024145  | 1.10            | 6.06         |
| <i>Pnpla2</i>   | Patatin-like phospholipase domain containing 2 (adipose triglyceride lipase)                  | NM_001163689  | 0.95            | 1.37         |
| <i>Pnpla6</i>   | Patatin-like phospholipase domain containing 6 (iPLA <sub>2</sub> δ)                          | NM_001122818  | 1.14            | 1.02         |
| <i>Pnpla7</i>   | Patatin-like phospholipase domain containing 7                                                | NM_146251     | 0.97            | 0.80         |
| <i>Pnpla8</i>   | Patatin-like phospholipase domain containing 8 (iPLA <sub>2</sub> γ)                          | NM_026164     | 1.15            | 1.44         |
| <i>Pla2g6</i>   | Phospholipase A <sub>2</sub> , group VI (iPLA <sub>2</sub> β)                                 | NM_001199023  | 1.13            | 0.42         |
| <i>Pla2g7</i>   | Phospholipase A <sub>2</sub> , group VII (platelet-activating factor acetylhydrolase, plasma) | NM_013737     | 0.62            | 0.26         |
| <i>Pafah2</i>   | Platelet-activating factor acetylhydrolase 2                                                  | NM_001285872  | 1.03            | 2.10         |
| <i>Prdx6</i>    | Peroxiredoxin 6                                                                               | NM_007453     | 1.19            | 4.41         |
| <i>Pla2g15</i>  | Phospholipase A <sub>2</sub> , group XV                                                       | NM_133792     | 0.90            | 0.41         |
| <i>Pla2g16</i>  | Phospholipase A <sub>2</sub> , group XVI                                                      | NM_139269     | 0.98            | 1.15         |
| <i>Lypla1</i>   | Lysophospholipase 1                                                                           | NM_008866     | 1.09            | 1.47         |
| <i>Lypla2</i>   | Lysophospholipase 2                                                                           | NM_011942     | 0.98            | 1.13         |
| <i>Abhd1</i>    | Abhydrolase domain containing 1                                                               | NM_021304     | 0.99            | 2.78         |
| <i>Abhd2</i>    | Abhydrolase domain containing 2                                                               | NM_018811     | 1.08            | 1.44         |
| <i>Abhd4</i>    | Abhydrolase domain containing 4                                                               | NM_134076     | 1.22            | 0.66         |
| <i>Abhd5</i>    | Abhydrolase domain containing 5                                                               | NM_026179     | 1.26            | 1.24         |

|                |                                   |              |      |      |
|----------------|-----------------------------------|--------------|------|------|
| <i>Abhd6</i>   | Abhydrolase domain containing 6   | NM_025341    | 1.49 | 1.51 |
| <i>Abhd8</i>   | Abhydrolase domain containing 8   | NM_022419    | 0.93 | 0.67 |
| <i>Abhd10</i>  | Abhydrolase domain containing 10  | NM_172511    | 1.05 | 0.89 |
| <i>Abhd11</i>  | Abhydrolase domain containing 11  | NM_145215    | 0.93 | 1.19 |
| <i>Abhd12</i>  | Abhydrolase domain containing 12  | NM_024465    | 0.93 | 0.29 |
| <i>Abhd13</i>  | Abhydrolase domain containing 13  | NM_026868    | 2.45 | 1.19 |
| <i>Abhd14a</i> | Abhydrolase domain containing 14A | NM_001110271 | 1.07 | 0.68 |
| <i>Abhd14b</i> | Abhydrolase domain containing 14B | NM_029631    | 1.00 | 2.66 |
| <i>Abhd15</i>  | Abhydrolase domain containing 15  | NM_026185    | 1.19 | 0.28 |
| <i>Abhd16a</i> | Abhydrolase domain containing 16A | NM_178592    | 1.00 | 1.39 |
| <i>Abhd17a</i> | Abhydrolase domain containing 17A | NM_145421    | 1.01 | 1.09 |
| <i>Abhd17b</i> | Abhydrolase domain containing 17B | NM_146096    | 0.91 | 1.48 |

### Other lipases

| Gene Name    | Description                                        | Accession No. | Normal<br>KO/WT | AOM<br>KO/WT |
|--------------|----------------------------------------------------|---------------|-----------------|--------------|
| <i>Plbd1</i> | Phospholipase B domain containing 1                | NM_025806     | 1.05            | 3.07         |
| <i>Plbd2</i> | Phospholipase B domain containing 2                | NM_023625     | 1.02            | 1.04         |
| <i>Plcb1</i> | Phospholipase C, beta 1                            | NM_001145830  | 0.52            | 1.73         |
| <i>Plcb3</i> | Phospholipase C, beta 3                            | NM_001290349  | 0.99            | 2.97         |
| <i>Plcb4</i> | Phospholipase C, beta 4                            | NM_013829     | 1.06            | 3.12         |
| <i>Plcg1</i> | Phospholipase C, gamma 1                           | NM_021280     | 1.23            | 0.28         |
| <i>Plcg2</i> | Phospholipase C, gamma 2                           | NM_172285     | 0.84            | 0.29         |
| <i>Plcd1</i> | Phospholipase C, delta 1                           | NM_019676     | 1.08            | 4.25         |
| <i>Plcd3</i> | Phospholipase C, delta 3                           | NM_152813     | 1.35            | 0.57         |
| <i>Plce1</i> | Phospholipase C, epsilon 1                         | NM_019588     | 1.03            | 4.16         |
| <i>Plch1</i> | Phospholipase C, eta 1                             | NM_001177732  | 0.86            | 1.28         |
| <i>Plch2</i> | Phospholipase C, eta 2                             | NM_175556     | 1.06            | 4.22         |
| <i>Pld1</i>  | Phospholipase D1                                   | NM_001164056  | 1.10            | 2.18         |
| <i>Pld2</i>  | Phospholipase D2                                   | NM_008876     | 0.95            | 0.46         |
| <i>Pld3</i>  | Phospholipase D family, member 3                   | NM_011116     | 0.97            | 0.47         |
| <i>Pld4</i>  | Phospholipase D family, member 4                   | NM_178911     | 0.95            | 0.41         |
| <i>Pld6</i>  | Phospholipase D family, member 6                   | NM_001290283  | 1.10            | 1.04         |
| <i>Lpl</i>   | Lipoprotein lipase                                 | NM_008509     | 1.41            | 0.51         |
| <i>Lipg</i>  | Lipase, endothelial                                | NM_010720     | 1.24            | 10.19        |
| <i>Liph</i>  | Lipase, member H                                   | NM_153404     | 1.04            | 2.22         |
| <i>Lipo1</i> | Lipase, member O1                                  | NM_001013770  | 1.01            | 1.16         |
| <i>Mgl1</i>  | Monoglyceride lipase                               | NM_001166251  | 1.14            | 3.27         |
| <i>Dagla</i> | Diacylglycerol lipase, alpha                       | NM_198114     | 0.96            | 2.35         |
| <i>Daglb</i> | Diacylglycerol lipase, beta                        | NM_144915     | 0.95            | 1.89         |
| <i>Enpp1</i> | Ectonucleotide pyrophosphatase/phosphodiesterase 1 | NM_008813     | 0.88            | 1.17         |

## Fatty acid $\beta$ -oxidation

| Gene Name     | Description                                                                                                      | Accession No. | Normal | AOM   |
|---------------|------------------------------------------------------------------------------------------------------------------|---------------|--------|-------|
|               |                                                                                                                  |               | KO/WT  | KO/WT |
| <i>Acad8</i>  | Acyl-CoA dehydrogenase family, member 8                                                                          | NM_025862     | 0.97   | 2.19  |
| <i>Acad9</i>  | Acyl-CoA dehydrogenase family, member 9                                                                          | NM_172678     | 0.96   | 1.11  |
| <i>Acad10</i> | Acyl-CoA dehydrogenase family, member 10                                                                         | NM_028037     | 1.03   | 1.10  |
| <i>Acad11</i> | Acyl-CoA dehydrogenase family, member 11                                                                         | NM_175324     | 1.21   | 3.07  |
| <i>Acad12</i> | Acyl-CoA dehydrogenase family, member 12                                                                         | NM_178799     | 1.32   | 1.57  |
| <i>Acads</i>  | Acyl-CoA dehydrogenase, short chain                                                                              | NM_007383     | 0.97   | 2.13  |
| <i>Acadm</i>  | Acyl-CoA dehydrogenase, medium chain                                                                             | NM_007382     | 1.00   | 3.48  |
| <i>Acadl</i>  | Acyl-CoA dehydrogenase, long chain                                                                               | NM_007381     | 1.00   | 1.32  |
| <i>Ech1</i>   | Enoyl CoA hydratase 1, peroxisomal                                                                               | NM_016772     | 1.00   | 1.86  |
| <i>Echs1</i>  | Enoyl CoA hydratase, short chain, 1, mitochondrial                                                               | NM_053119     | 0.99   | 1.96  |
| <i>Echdc1</i> | Enoyl CoA hydratase domain containing 1                                                                          | NM_025855     | 0.98   | 1.02  |
| <i>Echdc2</i> | Enoyl CoA hydratase domain containing 2                                                                          | NM_026728     | 1.11   | 0.15  |
| <i>Echdc3</i> | Enoyl CoA hydratase domain containing 3                                                                          | NM_024208     | 1.02   | 1.96  |
| <i>Ehhadh</i> | Enoyl-CoA, hydratase/3-hydroxyacyl CoA dehydrogenase                                                             | NM_023737     | 1.10   | 4.53  |
| <i>Hadha</i>  | Hydroxyacyl-CoA dehydrogenase/3-ketoacyl-CoA thiolase/enoyl-CoA hydratase (trifunctional protein), alpha subunit | NM_178878     | 1.07   | 1.32  |
| <i>Acat1</i>  | Acetyl-CoA acetyltransferase 1                                                                                   | NM_144784     | 1.09   | 2.51  |
| <i>Acat2</i>  | Acetyl-CoA acetyltransferase 2                                                                                   | NM_009338     | 0.79   | 1.11  |
| <i>Acat3</i>  | Acetyl-CoA acetyltransferase 3                                                                                   | NM_153151     | 0.79   | 0.80  |

**Supplementary Table 2.**  
**Primers and probes for quantitative RT-PCR.**

| Name               | Assay No.<br>(Applied Biosystems) |
|--------------------|-----------------------------------|
| <i>Pla2g3</i>      | Mm01191142_m1                     |
| <i>Il1b</i>        | Mm00434228_m1                     |
| <i>Il6</i>         | Mm00446190_m1                     |
| <i>Il17a</i>       | Mm00439618_m1                     |
| <i>Il22</i>        | Mm00444241_m1                     |
| <i>Il23</i>        | Mm01160011_g1                     |
| <i>Tnf</i>         | Mm00443258_m1                     |
| <i>Ptgs2</i>       | Mm00478374_m1                     |
| <i>Ptges</i>       | Mm00452105_m1                     |
| <i>Mcpt1</i>       | Mm00656886_g1                     |
| <i>Mcpt2</i>       | Mm00484932_m1                     |
| <i>Arg1</i>        | Mm00475988_m1                     |
| <i>Chil3 (Ym1)</i> | Mm00657889_mH                     |
| <i>Foxp3</i>       | Mm00475162_m1                     |
| <i>Vegfa</i>       | Mm01281449_m1                     |
| <i>Mmp9</i>        | Mm00442991_m1                     |
| <i>Cldn1</i>       | Mm00516701_m1                     |
| <i>Muc2</i>        | Mm01276696_m1                     |
